# Supplementary material for: Additive Effects of Exercise or Nutrition Intervention in a 24-Month Multidisciplinary Treatment with a Booster Intervention for Children and Adolescents with Overweight or Obesity: The ICAAN Study
Source: MDPI journal article supplement (doi:10.3390/nu14020387), 2022-01-17
Supplement: s1 [file s1]

Supplementary Table S1. ICAAN program: Phase 1-4

| Session                       | Subject                 | Content                                                                                                                             |
|-------------------------------|-------------------------|-------------------------------------------------------------------------------------------------------------------------------------|
| Phase 1 (1:1 intervention)    |                         |                                                                                                                                     |
| Month 1                       | Learn my body           | - Physical examination results<br>- Goal setting                                                                                    |
| Month 2                       | Manage my body 1        | Self-examination<br>- Personal issues related to weight<br>- The environment: family and lifestyle                                  |
| Month 3                       | Manage my body 2        | Physical activity<br>- Activity level examination<br>- Individualized exercise plan                                                 |
| Month 4                       | Manage my body 3        | Motivational enhancement and Mindfulness<br>- Encouraging health-related behavior choices<br>- Identifying problems and strengths   |
| Month 5                       | Manage my body 4        | Physical activity 2<br>- Increasing activity<br>- Decreasing inactivity                                                             |
| Month 6                       | Manage my body 5        | Self-observation<br>- Acknowledging changes: body image<br>- Acknowledging changes: cognition                                       |
| Phase 2 (group program)       |                         |                                                                                                                                     |
| Month 7                       | Nutrition               | Lose sugar and become super<br>Enjoy your food with all 5 senses                                                                    |
| Month 8                       | Physical activity       | Zumba dance class                                                                                                                   |
| Month 9                       | Behavioral modification | A journey to finding myself                                                                                                         |
| Month 10                      | Nutrition               | Nutritional experimentation laboratory<br>Become a healthy grown-up                                                                 |
| Month 11                      | Physical activity       | Pilates class                                                                                                                       |
| Month 12                      | Behavioral modification | Stop and Think                                                                                                                      |
| Phase 3 (1:1 booster session) |                         |                                                                                                                                     |
| Month 13                      | Changes in action 1     | Self-evaluation of change<br>- Changes in the last 12 months<br>- Risk/protective factors                                           |
| Month 14                      | Changes in action 2     | Overcoming obstacles<br>- Motivational changes<br>- Resources for problem solving                                                   |
| Month 15                      | Changes in action 3     | Finding strengths<br>- Validation of the problem-solving trials<br>- Encouraging individual strengths                               |
| Month 16                      | Maintaining change 1    | Behavioral modification counseling<br>- Healthy habits to continue after treatment<br>- Expected difficulties and coping strategies |
| Month 17                      | Maintaining change 2    | Nutritional counseling<br>- Healthy eating habits to continue after treatment<br>- Parental guide for weight loss maintenance       |
| Month 18                      | Maintaining change 3    | Exercise counseling<br>- Physical activities to continue after treatment<br>- Individualized goals after treatment termination      |
| Phase 4 (group program)       |                         |                                                                                                                                     |
| Month 20                      | Behavioral modification | Mindful eating: Learning my feelings and thoughts                                                                                   |
| Month 21                      | Nutrition               | What is in my refrigerator?<br>What can I eat in a convenience store?                                                               |
| Month 22                      | Exercise                | Tae-Bo (Taekwondo & Boxing) class                                                                                                   |
| Month 23                      | Behavioral modification | Learning to be on my own: making a resolution                                                                                       |
