# Supplementary material for: Additive Effects of Exercise or Nutrition Intervention in a 24-Month Multidisciplinary Treatment with a Booster Intervention for Children and Adolescents with Overweight or Obesity: The ICAAN Study
Source: MDPI journal article supplement (doi:10.3390/nu14020387), 2022-01-17
Supplement: s1 [file s1]

Supplementary Table S2. ICAAN Exercise Program

| Module | Exercise program                                                                                                 |
|--------|------------------------------------------------------------------------------------------------------------------|
| 1      | Butt Kicker → Wood Chop → Plank Jack → Squat → Lunge → Plank                                                     |
| 2      | Standing Bird Dog → Up-down Plank → Side Lunge → Rotational Chop → Running Mountain Climber → Plank              |
| 3      | Alternating Fast Feet → In-and-Out Squat → Hands-up Side Bend → Side-to-Side Mountain Climber → Wall Sit → Plank |
| 4      | Jumping Jack → Buffy → Frogger Plank → Wall Squat → Side-Kick Mountain Climber → Plank                           |
| 5      | High Knee Run → Mountain Climber → Arm Walking → Jump Squat → Long Jump Buffy → Plank                            |
| 6      | Ski Jump → Wide Squat Pulse → Flow Push-up → Buffy Knee Kick → Scissors → Plank                                  |
