# Supplementary material for: Additive Effects of Exercise or Nutrition Intervention in a 24-Month Multidisciplinary Treatment with a Booster Intervention for Children and Adolescents with Overweight or Obesity: The ICAAN Study
Source: MDPI journal article supplement (doi:10.3390/nu14020387), 2022-01-17
Supplement: s1 [file s1]

Supplementary Table S3. ICAAN Nutritional Education Program

| Session  | Usual care/Exercise Group                                                                        | Nutrition Group                                                                                                                            |
|----------|--------------------------------------------------------------------------------------------------|--------------------------------------------------------------------------------------------------------------------------------------------|
| Phase 1  |                                                                                                  |                                                                                                                                            |
| Month 1  | Checking the food diary<br>Nutrition education: A balanced diet                                  | Individual management according to the Nutritional Care Process (NCP)<br>Checking the food diary<br>Nutrition education: A balanced diet   |
| Month 2  | Checking the food diary<br>Nutrition education: Healthy protein                                  | Individual management according to the NCP<br>Checking the food diary<br>Nutrition education: Healthy protein                              |
| Month 3  | Checking the food diary<br>Nutrition education: Five colors of fruits and vegetables             | Individual management according to the NCP<br>Checking the food diary<br>Nutrition education: Five colors of fruits and vegetables         |
| Month 4  | Checking the food diary<br>Nutrition education: Food portions using hands                        | Individual management according to the NCP<br>Checking the food diary<br>Nutrition education: Food portions using hands                    |
| Month 5  | Checking the food diary<br>Nutrition education: Learn the nutritional facts label                | Individual management according to the NCP<br>Checking the food diary<br>Nutrition education: Learn the nutritional facts label            |
| Month 6  | Checking the food diary<br>Nutrition education: High calorie and low nutritional food            | Individual management according to the NCP<br>Checking the food diary<br>Nutrition education: High calorie and low nutritional food        |
| Phase 3  |                                                                                                  |                                                                                                                                            |
| Month 13 | Checking the food diary<br>Problem solving/reinforcement according to the food intake monitoring | Individual management according to the NCP<br>Checking the food diary<br>Problem solving/reinforcement according to food intake monitoring |
| Month 14 | Checking the food diary<br>Problem solving/reinforcement according to the food intake monitoring | Individual management according to the NCP<br>Checking the food diary<br>Problem solving/reinforcement according to food intake monitoring |
| Month 15 | Checking the food diary<br>Problem solving/reinforcement according to the food intake monitoring | Individual management according to the NCP<br>Checking the food diary<br>Problem solving/reinforcement according to food intake monitoring |
